# Supplementary material
Source: PubMed Central journal article supplement (PMC6996030)
Supplement: supp_8.1.E34_2019-0090-1-at.pdf [file supp_8.1.E34_2019-0090-1-at.pdf]

**Appendix 1 (as supplied by the authors): List of public directories**

|                                                                                                                                                                                                                                                                          |
|--------------------------------------------------------------------------------------------------------------------------------------------------------------------------------------------------------------------------------------------------------------------------|
| <b>National Directories</b>                                                                                                                                                                                                                                              |
| Royal College of Physicians and Surgeons of Canada Directory<br><a href="https://rclogin.royalcollege.ca/webcenter/portal/rcdirectory_en?adf.ctrl-state=13ark6qlzq_14">https://rclogin.royalcollege.ca/webcenter/portal/rcdirectory_en? adf.ctrl-state=13ark6qlzq_14</a> |
| <b>Provincial Directories</b>                                                                                                                                                                                                                                            |
| College of Physicians and Surgeons of British Columbia (CPSBC)<br><a href="https://www.cpsbc.ca/physician_search">https://www.cpsbc.ca/physician_search</a>                                                                                                              |
| College of Physicians and Surgeons of Alberta (CPSA)<br><a href="https://search.cpsa.ca/physiciansearch">https://search.cpsa.ca/physiciansearch</a>                                                                                                                      |
| College of Physicians and Surgeons of Saskatchewan (CPSS)<br><a href="https://sk.211.ca/service/9735185_25145455/find_a_physician">https://sk.211.ca/service/9735185_25145455/find_a_physician</a>                                                                       |
| College of Physicians and Surgeons of Manitoba (CPSM)<br><a href="https://cpsm.mb.ca/physician-directory">https://cpsm.mb.ca/physician-directory</a>                                                                                                                     |
| College of Physicians and Surgeons of Ontario (CPSO)<br><a href="https://www.cpso.on.ca">https://www.cpso.on.ca</a>                                                                                                                                                      |
| College de Mediciens du Quebec (CMQ)<br><a href="http://www.cmq.org/bottin/index.aspx?lang=en&amp;a=1">http://www.cmq.org/bottin/index.aspx?lang=en&amp;a=1</a>                                                                                                          |
| College of Physicians and Surgeons of Nova Scotia (CPSNS)<br><a href="https://cpsnsphysiciansearch.azurewebsites.net/">https://cpsnsphysiciansearch.azurewebsites.net/</a>                                                                                               |
| College of Physicians and Surgeons of Newfoundland and Labrador (CPSNL)<br><a href="https://www.cpsnl.ca/WEB/CPSNL/PhysicianSearch/Physician_Search.aspx">https://www.cpsnl.ca/WEB/CPSNL/PhysicianSearch/Physician_Search.aspx</a>                                       |
| <b>Divisional Directories</b>                                                                                                                                                                                                                                            |
| UBC General Surgery<br><a href="https://surgery.med.ubc.ca/faculty-staff/directory/#General-Surgery">https://surgery.med.ubc.ca/faculty-staff/directory/#General-Surgery</a>                                                                                             |
| Calgary General Surgery<br><a href="https://cumming.ucalgary.ca/departments/surgery/sections/general-surgery">https://cumming.ucalgary.ca/departments/surgery/sections/general-surgery</a>                                                                               |
| University of Alberta General Surgery<br><a href="https://www.ualberta.ca/surgery/divisions/general-surgery">https://www.ualberta.ca/surgery/divisions/general-surgery</a>                                                                                               |
| University of Saskatchewan General Surgery<br><a href="https://medicine.usask.ca/profiles/surgery/general-surgery/index.php">https://medicine.usask.ca/profiles/surgery/general-surgery/index.php</a>                                                                    |
| University of Manitoba General Surgery<br><a href="http://umanitoba.ca/faculties/health_sciences/medicine/units/surgery/general_program/faculty.html">http://umanitoba.ca/faculties/health_sciences/medicine/units/surgery/general_program/faculty.html</a>              |
| Northern Ontario School of Medicine (NOSM) General Surgery<br><a href="https://www.nosm.ca/generalsurgery/">https://www.nosm.ca/generalsurgery/</a>                                                                                                                      |
| Western University General Surgery<br><a href="https://www.schulich.uwo.ca/generalsurgery/people/faculty.html">https://www.schulich.uwo.ca/generalsurgery/people/faculty.html</a>                                                                                        |
| McMaster University General Surgery<br><a href="https://surgery.mcmaster.ca/divisions/general-surgery/faculty">https://surgery.mcmaster.ca/divisions/general-surgery/faculty</a>                                                                                         |
| University of Toronto General Surgery<br><a href="https://surgery.utoronto.ca/faculty-division-general-surgery">https://surgery.utoronto.ca/faculty-division-general-surgery</a>                                                                                         |
| Queen's University General Surgery<br><a href="https://surgery.queensu.ca/postgraduate/general-surgery/faculty-directory">https://surgery.queensu.ca/postgraduate/general-surgery/faculty-directory</a>                                                                  |
| University of Ottawa General Surgery<br><a href="https://www.med.uottawa.ca/surgery/eng/05bb_faculty.html">https://www.med.uottawa.ca/surgery/eng/05bb_faculty.html</a>                                                                                                  |

|                                                                                                                                                                                                                                                                                               |
|-----------------------------------------------------------------------------------------------------------------------------------------------------------------------------------------------------------------------------------------------------------------------------------------------|
| McGill University General Surgery<br><a href="https://www.mcgill.ca/generalsurgery/people">https://www.mcgill.ca/generalsurgery/people</a>                                                                                                                                                    |
| University of Montreal General Surgery<br><a href="https://chirurgie.umontreal.ca/departement/les-divisions/chirurgie-generale/">https://chirurgie.umontreal.ca/departement/les-divisions/chirurgie-generale/</a>                                                                             |
| Laval University General Surgery<br><a href="https://www.fmed.ulaval.ca/faculte-et-reseau/a-propos-de-la-faculte/departements/departement-de-chirurgie/">https://www.fmed.ulaval.ca/faculte-et-reseau/a-propos-de-la-faculte/departements/departement-de-chirurgie/</a>                       |
| Sherbrooke University General Surgery<br><a href="https://www.usherbrooke.ca/departement-chirurgie/francais/personnel/">https://www.usherbrooke.ca/departement-chirurgie/francais/personnel/</a>                                                                                              |
| Dalhousie University General Surgery<br><a href="https://medicine.dal.ca/departments/departement-sites/surgery/divisions/general-surgery/our-people/our-faculty.html">https://medicine.dal.ca/departments/departement-sites/surgery/divisions/general-surgery/our-people/our-faculty.html</a> |
| Memorial University General Surgery<br><a href="https://www.med.mun.ca/Surgery/Divisions/General-Surgery-(1).aspx">https://www.med.mun.ca/Surgery/Divisions/General-Surgery-(1).aspx</a>                                                                                                      |
